# Supplementary material for: Structure and vibrational properties of ethyltrioxorhenium(vii), C2H5ReO3, investigated by gas electron diffraction, single crystal X-ray diffraction, IR spectroscopy and quantum chemical calculations
Source: Royal Society of Chemistry journal article supplement (doi:10.1039/b204235p), 2002-01-01
Supplement: b204235p-1.pdf [file b204235p-1.pdf]

ReO3C2H5

\*\*\*\*\*  
\* FREQUENCIES \*  
\*\*\*\*\*

Coordinates (Cartesian)

| Atom      |           | bohr                  |           |           |          |  |
|-----------|-----------|-----------------------|-----------|-----------|----------|--|
| angstrom  |           | Geometric Variables   |           |           |          |  |
|           |           | X                     | Y         | Z         | X        |  |
| Y         | Z         | (0:frozen, *:LT par.) |           |           |          |  |
| 1 Re      | 3.051612  | 0.000000              | 0.000000  | 0.000000  | 1.614843 |  |
| 0.000000  | 0.000000  | 1                     | 2         | 3         |          |  |
| 2 O       | 3.408859  | 1.763826              | 2.717490  | 1.803890  |          |  |
| 0.933376  | 1.438034  | 4                     | 5         | 6         |          |  |
| 3 O       | 3.408859  | 1.763826              | -2.717490 | 1.803890  |          |  |
| 0.933376  | -1.438034 | 7                     | 8         | 9         |          |  |
| 4 O       | 4.850053  | -2.717966             | 0.000000  | 2.566537  |          |  |
| -1.438285 | 0.000000  | 10                    | 11        | 12        |          |  |
| 5 C       | -0.718758 | -1.222714             | 0.000000  | -0.380350 |          |  |
| -0.647032 | 0.000000  | 13                    | 14        | 15        |          |  |
| 6 C       | -2.664334 | 0.923189              | 0.000000  | -1.409904 |          |  |
| 0.488531  | 0.000000  | 16                    | 17        | 18        |          |  |
| 7 H       | -2.476233 | 2.124797              | -1.680310 | -1.310366 |          |  |
| 1.124394  | -0.889181 | 19                    | 20        | 21        |          |  |
| 8 H       | -2.476233 | 2.124797              | 1.680310  | -1.310366 |          |  |
| 1.124394  | 0.889181  | 22                    | 23        | 24        |          |  |
| 9 H       | -4.584422 | 0.124934              | 0.000000  | -2.425971 |          |  |
| 0.066112  | 0.000000  | 25                    | 26        | 27        |          |  |
| 10 H      | -0.899702 | -2.442345             | 1.678842  | -0.476102 |          |  |
| -1.292433 | 0.888405  | 28                    | 29        | 30        |          |  |
| 11 H      | -0.899702 | -2.442345             | -1.678842 | -0.476102 |          |  |
| -1.292433 | -0.888405 | 31                    | 32        | 33        |          |  |

Atomic Masses:

|       |              |
|-------|--------------|
| 1. Re | 186.95575000 |
| 2. O  | 15.99491400  |
| 3. O  | 15.99491400  |
| 4. O  | 15.99491400  |
| 5. C  | 12.00000000  |
| 6. C  | 12.00000000  |
| 7. H  | 1.00782500   |
| 8. H  | 1.00782500   |
| 9. H  | 1.00782500   |

10. H            1.00782500  
11. H            1.00782500

Force Constants Matrix: Computed (free variables)

1) 0.4139 -0.1389 0.0000 -0.0442 -0.0324 -0.0626 -0.0442  
-0.0324 0.0626 -0.1901  
0.2322 0.0000 -0.0945 -0.0215 0.0000 -0.0255 0.0010  
0.0000 -0.0001 -0.0002  
-0.0003 -0.0001 -0.0002 0.0003 -0.0008 0.0040 0.0000  
-0.0072 -0.0059 0.0027  
-0.0072 -0.0059 -0.0027

2) -0.1390 0.7987 0.0000 -0.0249 -0.1948 -0.2053 -0.0249  
-0.1948 0.2053 0.2168  
-0.3562 0.0000 -0.0182 -0.0390 0.0000 0.0073 0.0060  
0.0000 0.0026 -0.0004  
0.0009 0.0026 -0.0004 -0.0009 0.0021 -0.0029 0.0000  
-0.0122 -0.0081 0.0009  
-0.0122 -0.0081 -0.0009

3) -0.0005 0.0002 0.8427 -0.0502 -0.2016 -0.3688 0.0503  
0.2016 -0.3689 0.0001  
-0.0002 -0.0624 0.0000 0.0000 -0.0339 0.0000 0.0000  
-0.0020 -0.0030 0.0015  
-0.0003 0.0030 -0.0015 -0.0003 0.0001 0.0000 -0.0010  
0.0172 0.0059 -0.0026  
-0.0171 -0.0059 -0.0026

4) -0.0442 -0.0253 -0.0514 0.0304 0.0292 0.0507 0.0023  
0.0060 -0.0011 0.0103  
-0.0032 0.0131 -0.0020 -0.0067 -0.0117 0.0019 0.0004  
0.0002 0.0000 0.0001  
0.0001 0.0008 -0.0003 -0.0001 0.0005 -0.0010 -0.0005  
0.0024 0.0010 0.0000  
-0.0024 -0.0001 0.0008

5) -0.0316 -0.1940 -0.2001 0.0290 0.1771 0.2175 0.0059  
0.0299 -0.0070 0.0021  
-0.0106 -0.0095 -0.0033 -0.0045 0.0000 0.0000 -0.0005  
-0.0005 0.0000 -0.0001  
-0.0001 -0.0006 0.0003 0.0004 -0.0002 0.0006 0.0005  
-0.0013 0.0006 -0.0013  
-0.0002 0.0011 0.0002

6) -0.0625 -0.2041 -0.3690 0.0503 0.2176 0.3683 0.0015  
0.0063 -0.0189 0.0198  
-0.0201 0.0133 -0.0038 0.0019 0.0055 -0.0030 -0.0029 -0.0002 0.0005  
0.0000  
0.0003 -0.0006 0.0005 0.0001 -0.0006 0.0014 0.0003  
-0.0030 -0.0008 -0.0006  
0.0015 0.0002 0.0009

7) 0.0000 0.0000 0.0000 0.0000 0.0000 0.0000 0.0000  
0.0000 0.0000 0.0000  
0.0000 0.0000 0.0000 0.0000 0.0000 0.0000 0.0000  
0.0000 0.0000 0.0000  
0.0000 0.0000 0.0000 0.0000 0.0000 0.0000 0.0000  
0.0000 0.0000 0.0000  
0.0000 0.0000 0.0000

8) 0.0000 0.0000 0.0000 0.0000 0.0000 0.0000 0.0000  
0.0000 0.0000 0.0000  
0.0000 0.0000 0.0000 0.0000 0.0000 0.0000 0.0000  
0.0000 0.0000 0.0000  
0.0000 0.0000 0.0000 0.0000 0.0000 0.0000 0.0000  
0.0000 0.0000 0.0000  
0.0000 0.0000 0.0000

9) 0.0000 0.0000 0.0000 0.0000 0.0000 0.0000 0.0000  
0.0000 0.0000 0.0000  
0.0000 0.0000 0.0000 0.0000 0.0000 0.0000 0.0000  
0.0000 0.0000 0.0000  
0.0000 0.0000 0.0000 0.0000 0.0000 0.0000 0.0000  
0.0000 0.0000 0.0000  
0.0000 0.0000 0.0000

10) -0.1907 0.2168 0.0000 0.0105 0.0025 0.0198 0.0105  
0.0025 -0.0198 0.1779  
-0.2296 0.0000 -0.0093 0.0078 0.0000 -0.0001 -0.0021  
0.0000 0.0001 0.0000  
0.0001 0.0001 0.0000 -0.0001 -0.0004 0.0004 0.0000  
0.0007 0.0009 -0.0007  
0.0007 0.0009 0.0007

11) 0.2325 -0.3563 0.0000 -0.0034 -0.0106 -0.0197 -0.0034  
-0.0106 0.0197 -0.2296  
0.3633 0.0000 -0.0015 0.0133 0.0000 -0.0012 -0.0007  
0.0000 -0.0003 -0.0002  
-0.0003 -0.0003 -0.0002 0.0003 -0.0001 -0.0001 0.0000  
0.0036 0.0010 0.0009  
0.0036 0.0010 -0.0009

12) -0.0005 -0.0003 -0.0641 0.0129 -0.0090 0.0137 -0.0129  
0.0092 0.0136 0.0002  
-0.0001 0.0362 0.0001 0.0000 -0.0027 0.0000 0.0000  
0.0014 0.0003 -0.0002  
0.0000 -0.0002 0.0002 0.0000 0.0001 0.0000 0.0000  
0.0002 -0.0004 0.0010  
0.0000 0.0005 0.0010

13) -0.0939 -0.0171 0.0000 -0.0021 -0.0035 -0.0037 -0.0021  
-0.0035 0.0037 -0.0097  
-0.0018 0.0000 0.3089 -0.0236 0.0000 -0.1046 0.0474  
0.0000 -0.0007 -0.0013  
-0.0009 -0.0007 -0.0013 0.0009 -0.0221 0.0248 0.0000  
-0.0365 -0.0101 0.0181  
-0.0365 -0.0101 -0.0181

14) -0.0204 -0.0407 0.0000 -0.0069 -0.0040 0.0020 -0.0069  
-0.0040 -0.0020 0.0077  
0.0134 0.0000 -0.0237 0.4223 0.0000 0.0683 -0.1215  
0.0000 0.0121 -0.0132  
-0.0012 0.0121 -0.0132 0.0012 -0.0023 0.0052 0.0000  
-0.0200 -0.1222 0.1141  
-0.0200 -0.1222 -0.1141

15) -0.0005 -0.0002 -0.0342 -0.0116 0.0002 0.0056 0.0117  
0.0000 0.0056 0.0002  
-0.0001 -0.0029 0.0001 0.0000 0.4981 -0.0003 -0.0001  
-0.0709 -0.0185 0.0172  
0.0016 0.0185 -0.0172 0.0016 0.0003 0.0001 -0.0002  
0.0323 0.1206 -0.2021  
-0.0321 -0.1205 -0.2022

16) -0.0242 0.0075 0.0000 0.0017 -0.0002 -0.0031 0.0017  
-0.0002 0.0031 -0.0005  
-0.0009 0.0000 -0.1049 0.0687 0.0000 0.4632 0.0514  
0.0000 -0.0455 -0.0153  
0.0214 -0.0455 -0.0153 -0.0214 -0.2493 -0.0918 0.0000  
0.0016 -0.0021 0.0005  
0.0016 -0.0021 -0.0005

17) 0.0010 0.0059 0.0000 0.0005 -0.0005 -0.0029 0.0005  
-0.0005 0.0029 -0.0021  
-0.0004 0.0000 0.0471 -0.1218 0.0000 0.0512 0.4774  
0.0000 -0.0162 -0.1260  
0.1179 -0.0162 -0.1260 -0.1179 -0.0941 -0.0807 0.0000  
0.0142 -0.0138 -0.0007  
0.0142 -0.0138 0.0007

18) 0.0000 0.0000 -0.0022 0.0002 -0.0005 -0.0002 -0.0002  
0.0005 -0.0002 0.0000  
0.0000 0.0015 0.0000 0.0000 -0.0708 0.0000 -0.0001  
0.5399 0.0226 0.1171  
-0.2136 -0.0226 -0.1170 -0.2135 0.0000 0.0000 -0.0427  
-0.0184 0.0176 0.0009  
0.0183 -0.0176 0.0008

19) 0.0007 0.0039 -0.0043 -0.0002 -0.0002 0.0007 0.0011  
-0.0011 0.0011 -0.0001  
-0.0006 0.0005 -0.0008 0.0120 -0.0186 -0.0452 -0.0162  
0.0229 0.0504 0.0128  
-0.0232 -0.0010 0.0019 -0.0031 -0.0026 -0.0156 0.0234  
-0.0028 0.0037 0.0000  
0.0004 -0.0008 0.0005

20) -0.0010 -0.0014 0.0025 0.0002 0.0002 -0.0002 -0.0004  
0.0006 -0.0009 0.0002  
0.0000 -0.0005 -0.0010 -0.0130 0.0169 -0.0154 -0.1263  
0.1173 0.0128 0.1375  
-0.1298 0.0020 0.0115 -0.0148 -0.0007 -0.0071 0.0098  
0.0037 -0.0024 -0.0005

-0.0005 0.0005 0.0000

21) 0.0003 0.0023 -0.0014 -0.0001 -0.0003 0.0005 0.0003  
-0.0008 0.0002 -0.0001  
-0.0004 0.0002 -0.0012 -0.0015 0.0018 0.0209 0.1181  
-0.2138 -0.0231 -0.1297  
0.2287 0.0031 0.0147 -0.0188 0.0001 -0.0014 0.0006  
0.0002 -0.0009 0.0014  
-0.0005 0.0000 0.0006

22) 0.0000 0.0000 0.0000 0.0000 0.0000 0.0000 0.0000  
0.0000 0.0000 0.0000  
0.0000 0.0000 0.0000 0.0000 0.0000 0.0000 0.0000  
0.0000 0.0000 0.0000  
0.0000 0.0000 0.0000 0.0000 0.0000 0.0000 0.0000  
0.0000 0.0000 0.0000  
0.0000 0.0000 0.0000

23) 0.0000 0.0000 0.0000 0.0000 0.0000 0.0000 0.0000  
0.0000 0.0000 0.0000  
0.0000 0.0000 0.0000 0.0000 0.0000 0.0000 0.0000  
0.0000 0.0000 0.0000  
0.0000 0.0000 0.0000 0.0000 0.0000 0.0000 0.0000  
0.0000 0.0000 0.0000  
0.0000 0.0000 0.0000

24) 0.0000 0.0000 0.0000 0.0000 0.0000 0.0000 0.0000  
0.0000 0.0000 0.0000  
0.0000 0.0000 0.0000 0.0000 0.0000 0.0000 0.0000  
0.0000 0.0000 0.0000  
0.0000 0.0000 0.0000 0.0000 0.0000 0.0000 0.0000  
0.0000 0.0000 0.0000  
0.0000 0.0000 0.0000

25) -0.0011 0.0019 0.0000 0.0003 0.0000 -0.0005 0.0003  
0.0000 0.0005 -0.0004  
0.0000 0.0000 -0.0218 -0.0021 0.0000 -0.2495 -0.0943  
0.0000 -0.0021 -0.0010  
-0.0003 -0.0021 -0.0010 0.0003 0.2744 0.0970 0.0000  
0.0010 -0.0002 -0.0001  
0.0010 -0.0002 0.0001

26) 0.0038 -0.0018 0.0000 -0.0010 0.0003 0.0013 -0.0010  
0.0003 -0.0013 0.0003  
-0.0003 0.0000 0.0247 0.0053 0.0000 -0.0915 -0.0805  
0.0000 -0.0154 -0.0075  
-0.0012 -0.0154 -0.0075 0.0012 0.0969 0.0894 0.0000  
-0.0008 0.0011 -0.0001  
-0.0008 0.0011 0.0001

27) 0.0000 0.0001 -0.0011 -0.0006 0.0004 0.0003 0.0006  
-0.0005 0.0004 0.0000  
0.0000 0.0000 0.0000 0.0000 -0.0004 -0.0004 -0.0003  
-0.0424 0.0234 0.0099  
0.0004 -0.0234 -0.0097 0.0006 0.0003 0.0001 0.0419

-0.0003 -0.0003 0.0002  
0.0003 0.0003 0.0002

28) -0.0069 -0.0127 0.0184 0.0025 -0.0012 -0.0032 -0.0026  
0.0002 -0.0019 0.0006  
0.0040 -0.0002 -0.0366 -0.0201 0.0323 0.0019 0.0142  
-0.0184 -0.0026 0.0035  
0.0003 0.0005 -0.0006 0.0003 0.0010 -0.0007 -0.0003  
0.0417 0.0107 -0.0232  
0.0005 0.0027 -0.0041

29) -0.0057 -0.0081 0.0072 0.0011 0.0007 -0.0011 -0.0003  
0.0012 -0.0007 0.0008  
0.0011 -0.0007 -0.0099 -0.1225 0.1205 -0.0024 -0.0138  
0.0174 0.0037 -0.0025  
-0.0008 -0.0007 0.0004 -0.0002 0.0000 0.0013 -0.0002  
0.0107 0.1329 -0.1274  
0.0026 0.0093 -0.0142

30) 0.0030 0.0010 -0.0017 0.0000 -0.0013 -0.0008 -0.0007  
-0.0003 0.0008 -0.0010  
0.0009 0.0007 0.0182 0.1141 -0.2024 0.0007 -0.0007  
0.0010 -0.0001 -0.0005  
0.0012 -0.0004 0.0000 0.0005 -0.0005 -0.0001 0.0001  
-0.0231 -0.1273 0.2196  
0.0040 0.0141 -0.0191

31) 0.0000 0.0000 0.0000 0.0000 0.0000 0.0000 0.0000  
0.0000 0.0000 0.0000  
0.0000 0.0000 0.0000 0.0000 0.0000 0.0000 0.0000  
0.0000 0.0000 0.0000  
0.0000 0.0000 0.0000 0.0000 0.0000 0.0000 0.0000  
0.0000 0.0000 0.0000  
0.0000 0.0000 0.0000

32) 0.0000 0.0000 0.0000 0.0000 0.0000 0.0000 0.0000  
0.0000 0.0000 0.0000  
0.0000 0.0000 0.0000 0.0000 0.0000 0.0000 0.0000  
0.0000 0.0000 0.0000  
0.0000 0.0000 0.0000 0.0000 0.0000 0.0000 0.0000  
0.0000 0.0000 0.0000  
0.0000 0.0000 0.0000

33) 0.0000 0.0000 0.0000 0.0000 0.0000 0.0000 0.0000  
0.0000 0.0000 0.0000  
0.0000 0.0000 0.0000 0.0000 0.0000 0.0000 0.0000  
0.0000 0.0000 0.0000  
0.0000 0.0000 0.0000 0.0000 0.0000 0.0000 0.0000  
0.0000 0.0000 0.0000  
0.0000 0.0000 0.0000

Dipole: -1.396556 -0.317086 0.000000  
Derivatives:

1) 1.308927 -0.169442 0.000000

|     |           |           |           |
|-----|-----------|-----------|-----------|
| 2)  | -0.124589 | 1.639096  | -0.000006 |
| 3)  | 0.000603  | 0.000074  | 1.717031  |
| 4)  | -0.242414 | -0.074523 | -0.074694 |
| 5)  | -0.079221 | -0.441355 | -0.444462 |
| 6)  | -0.108930 | -0.425578 | -0.862227 |
| 7)  | 0.000000  | 0.000000  | 0.000000  |
| 8)  | 0.000000  | 0.000000  | 0.000000  |
| 9)  | 0.000000  | 0.000000  | 0.000000  |
| 10) | -0.544606 | 0.445892  | 0.000000  |
| 11) | 0.437339  | -0.906936 | 0.000000  |
| 12) | 0.000735  | 0.000043  | -0.164638 |
| 13) | -0.055714 | -0.074719 | 0.000000  |
| 14) | -0.124798 | -0.028607 | 0.000000  |
| 15) | 0.000088  | 0.000043  | 0.020807  |
| 16) | -0.078949 | -0.003652 | 0.000000  |
| 17) | -0.208849 | 0.042227  | 0.000000  |
| 18) | -0.001349 | -0.001807 | 0.045644  |
| 19) | 0.060925  | -0.011722 | 0.050912  |
| 20) | 0.041187  | 0.013266  | 0.046636  |
| 21) | 0.011903  | 0.066861  | -0.019363 |
| 22) | 0.000000  | 0.000000  | 0.000000  |
| 23) | 0.000000  | 0.000000  | 0.000000  |
| 24) | 0.000000  | 0.000000  | 0.000000  |
| 25) | -0.143506 | -0.021569 | 0.000000  |
| 26) | 0.030576  | 0.038773  | 0.000000  |
| 27) | 0.000194  | 0.000039  | 0.102573  |
| 28) | -0.054892 | -0.005037 | -0.006651 |

29) 0.030313 0.031529 0.038875  
 30) -0.052539 0.048734 0.024219  
 31) 0.000000 0.000000 0.000000  
 32) 0.000000 0.000000 0.000000  
 33) 0.000000 0.000000 0.000000

=====  
 Normal Modes in Symmetry Displacements \*\*\* (cartesians, not  
 mass-weighted) \*\*\*  
 =====

==== AA =====

Symmetry Displacements

|       | 1                   | 2                   |
|-------|---------------------|---------------------|
| 3     |                     |                     |
|       | -----               | -----               |
| 1.Re  | 0.039 0.000 0.000   | 0.000 0.038 0.000   |
| 0.000 | 0.000 0.000         |                     |
| 2.O   | -0.094 -0.001 0.000 | 0.017 -0.108 0.000  |
| 0.000 | 0.000 0.177         |                     |
| 3.O   | -0.094 -0.001 0.000 | 0.017 -0.108 0.000  |
| 0.000 | 0.000 -0.177        |                     |
| 4.O   | -0.098 -0.002 0.000 | -0.029 -0.123 0.000 |
| 0.000 | 0.000 0.000         |                     |
| 5.C   | -0.097 0.003 0.000  | -0.014 -0.066 0.000 |
| 0.000 | 0.000 0.000         |                     |
| 6.C   | -0.095 0.005 0.000  | 0.008 -0.047 0.000  |
| 0.000 | 0.000 0.000         |                     |
| 7.H   | -0.094 0.004 0.000  | 0.020 -0.049 0.000  |
| 0.000 | 0.000 0.000         |                     |
| 8.H   | -0.094 0.004 0.000  | 0.020 -0.049 0.000  |
| 0.000 | 0.000 0.000         |                     |
| 9.H   | -0.096 0.006 0.000  | 0.000 -0.027 0.000  |
| 0.000 | 0.000 0.000         |                     |
| 10.H  | -0.098 0.003 0.000  | -0.026 -0.065 0.000 |
| 0.000 | 0.000 0.000         |                     |
| 11.H  | -0.098 0.003 0.000  | -0.026 -0.065 0.000 |
| 0.000 | 0.000 0.000         |                     |

|   | 4     | 5     |
|---|-------|-------|
| 6 |       |       |
|   | ----- | ----- |



-----  
1.Re 0.000 0.000 0.000 0.000 0.000 0.000  
0.000 0.000 0.000  
2.O 0.124 0.024 0.000 0.000 0.121 0.000  
0.000 0.000 0.000  
3.O 0.124 0.024 0.000 0.000 0.121 0.000  
0.000 0.000 0.000  
4.O -0.063 0.046 0.000 -0.030 -0.164 0.000  
0.189 -0.062 0.000  
5.C -0.085 -0.036 0.000 -0.003 -0.063 0.000  
-0.120 0.019 0.000  
6.C -0.117 -0.065 0.000 0.036 -0.027 0.000  
-0.089 0.047 0.000  
7.H -0.135 -0.062 0.000 0.058 -0.031 0.000  
-0.071 0.044 0.000  
8.H -0.135 -0.062 0.000 0.058 -0.031 0.000  
-0.071 0.044 0.000  
9.H -0.105 -0.093 0.000 0.021 0.008 0.000  
-0.100 0.075 0.000  
10.H -0.067 -0.039 0.000 -0.025 -0.059 0.000  
-0.138 0.021 0.000  
11.H -0.067 -0.039 0.000 -0.025 -0.059 0.000  
-0.138 0.021 0.000

7 8  
9 -----

-----  
1.Re 0.000 0.000 0.000 0.000 0.000 0.000  
0.000 0.000 0.000  
2.O 0.000 0.000 0.000 0.000 0.000 0.000  
0.000 0.000 0.000  
3.O 0.000 0.000 0.000 0.000 0.000 0.000  
0.000 0.000 0.000  
4.O 0.000 0.078 0.000 0.000 0.000 0.000  
0.000 0.000 0.000  
5.C -0.110 -0.152 0.000 0.186 -0.076 0.000  
0.000 0.171 0.000  
6.C 0.108 0.045 0.000 -0.110 0.062 0.000  
0.033 -0.107 0.000  
7.H 0.230 0.026 0.000 -0.025 0.048 0.000  
0.163 -0.128 0.000  
8.H 0.230 0.026 0.000 -0.025 0.048 0.000  
0.163 -0.128 0.000  
9.H 0.027 0.240 0.000 -0.166 0.198 0.000  
-0.053 0.100 0.000  
10.H -0.234 -0.134 0.000 -0.348 -0.063 0.000  
-0.331 -0.298 0.000  
11.H -0.234 -0.134 0.000 -0.348 -0.063 0.000  
-0.331 -0.298 0.000

10 11  
12

| ----- |        |        | ----- |        |        |       |
|-------|--------|--------|-------|--------|--------|-------|
| ----- |        |        | ----- |        |        |       |
| 1.Re  | 0.000  | 0.000  | 0.000 | 0.000  | 0.000  | 0.000 |
| 0.000 | 0.000  | 0.000  |       |        |        |       |
| 2.O   | 0.000  | 0.000  | 0.000 | 0.000  | 0.000  | 0.000 |
| 0.000 | 0.000  | 0.000  |       |        |        |       |
| 3.O   | 0.000  | 0.000  | 0.000 | 0.000  | 0.000  | 0.000 |
| 0.000 | 0.000  | 0.000  |       |        |        |       |
| 4.O   | 0.000  | 0.000  | 0.000 | 0.000  | 0.000  | 0.000 |
| 0.000 | 0.000  | 0.000  |       |        |        |       |
| 5.C   | 0.000  | 0.000  | 0.000 | 0.000  | 0.000  | 0.000 |
| 0.000 | 0.000  | 0.000  |       |        |        |       |
| 6.C   | 0.148  | -0.007 | 0.000 | 0.000  | 0.156  | 0.000 |
| 0.000 | 0.000  | 0.000  |       |        |        |       |
| 7.H   | -0.485 | 0.004  | 0.000 | -0.054 | -0.376 | 0.000 |
| 0.000 | 0.000  | 0.704  |       |        |        |       |
| 8.H   | -0.485 | 0.004  | 0.000 | -0.054 | -0.376 | 0.000 |
| 0.000 | 0.000  | -0.704 |       |        |        |       |
| 9.H   | -0.367 | -0.120 | 0.000 | -0.006 | -0.427 | 0.000 |
| 0.000 | 0.000  | 0.000  |       |        |        |       |
| 10.H  | -0.215 | 0.097  | 0.000 | 0.057  | -0.337 | 0.000 |
| 0.000 | 0.000  | 0.000  |       |        |        |       |
| 11.H  | -0.215 | 0.097  | 0.000 | 0.057  | -0.337 | 0.000 |
| 0.000 | 0.000  | 0.000  |       |        |        |       |

15

13

14

| -----  |        |        | ----- |        |        |       |
|--------|--------|--------|-------|--------|--------|-------|
| -----  |        |        | ----- |        |        |       |
| 1.Re   | 0.000  | 0.000  | 0.000 | 0.000  | 0.000  | 0.000 |
| 0.000  | 0.000  | 0.000  |       |        |        |       |
| 2.O    | 0.000  | 0.000  | 0.000 | 0.000  | 0.000  | 0.000 |
| 0.000  | 0.000  | 0.000  |       |        |        |       |
| 3.O    | 0.000  | 0.000  | 0.000 | 0.000  | 0.000  | 0.000 |
| 0.000  | 0.000  | 0.000  |       |        |        |       |
| 4.O    | 0.000  | 0.000  | 0.000 | 0.000  | 0.000  | 0.000 |
| 0.000  | 0.000  | 0.000  |       |        |        |       |
| 5.C    | 0.000  | 0.000  | 0.000 | 0.000  | 0.000  | 0.000 |
| 0.000  | 0.000  | 0.000  |       |        |        |       |
| 6.C    | 0.000  | 0.000  | 0.000 | 0.000  | 0.000  | 0.000 |
| 0.000  | 0.000  | 0.000  |       |        |        |       |
| 7.H    | 0.366  | -0.042 | 0.000 | 0.000  | 0.543  | 0.000 |
| 0.000  | 0.000  | 0.000  |       |        |        |       |
| 8.H    | 0.366  | -0.042 | 0.000 | 0.000  | 0.543  | 0.000 |
| 0.000  | 0.000  | 0.000  |       |        |        |       |
| 9.H    | -0.587 | -0.464 | 0.000 | -0.048 | -0.431 | 0.000 |
| 0.667  | -0.465 | 0.000  |       |        |        |       |
| 10.H   | -0.073 | 0.274  | 0.000 | 0.024  | -0.327 | 0.000 |
| -0.334 | 0.232  | 0.000  |       |        |        |       |
| 11.H   | -0.073 | 0.274  | 0.000 | 0.024  | -0.327 | 0.000 |
| -0.334 | 0.232  | 0.000  |       |        |        |       |

16

```
-----  
-----  
1.Re    0.000 0.000 0.000  
2.O     0.000 0.000 0.000  
3.O     0.000 0.000 0.000  
4.O     0.000 0.000 0.000  
5.C     0.000 0.000 0.000  
6.C     0.000 0.000 0.000  
7.H     0.000 0.000 0.000  
8.H     0.000 0.000 0.000  
9.H     0.000 0.000 0.000  
10.H    0.000 0.000 0.704  
11.H    0.000 0.000 -0.704
```

Frequencies and Normal Modes

```
=====
```

|   | 1        | 2           | 3           | 4           | 5           |             |
|---|----------|-------------|-------------|-------------|-------------|-------------|
| 6 | 7        | 8           |             |             |             |             |
|   | 133.3166 | 246.1609    | 276.4756    | 318.8898    | 524.4922    |             |
|   | 931.7207 | 956.8237    | 985.3151    |             |             |             |
|   |          |             |             |             |             |             |
|   | 1        | 0.11120514  | 0.41860457  | -0.71231422 | 0.06713270  | -0.44901673 |
|   |          | -0.09239802 | -0.15735499 | 0.25370967  |             |             |
|   | 2        | 0.37296820  | 0.37654318  | 0.23479965  | -0.45301567 | -0.22147231 |
|   |          | 0.15048623  | 0.60908886  | 0.04900266  |             |             |
|   | 3        | -0.00433897 | 0.21462758  | -0.03404856 | -0.56417736 | -0.01346558 |
|   |          | -0.08430052 | -0.44904795 | -0.64203336 |             |             |
|   | 4        | 0.74344865  | -0.48072891 | 0.13040729  | 0.01802324  | -0.32394003 |
|   |          | -0.11131563 | -0.27803906 | 0.03514632  |             |             |
|   | 5        | 0.16482346  | 0.32290876  | 0.15446565  | 0.67925752  | -0.17908947 |
|   |          | 0.04191149  | 0.11272353  | -0.57867350 |             |             |
|   | 6        | -0.20710735 | -0.54720737 | -0.42430229 | -0.09493767 | -0.31096234 |
|   |          | 0.14831980  | 0.43929477  | -0.39597142 |             |             |
|   | 7        | -0.47422488 | -0.01147518 | 0.45802358  | -0.02996002 | -0.70649973 |
|   |          | -0.17638808 | -0.12771361 | 0.12839746  |             |             |
|   | 8        | 0.00302478  | -0.03864174 | -0.04233115 | -0.00935478 | -0.01734685 |
|   |          | 0.16549947  | -0.16412075 | 0.00275898  |             |             |
|   | 9        | 0.01784059  | -0.00449168 | -0.00735856 | 0.00777140  | 0.04923145  |
|   |          | -0.21177100 | 0.12752335  | 0.04130841  |             |             |
|   | 10       | 0.01367721  | -0.01150372 | -0.02903207 | -0.00885636 | 0.05482336  |
|   |          | -0.54075555 | 0.14831816  | -0.04893060 |             |             |
|   | 11       | 0.00204888  | -0.00605021 | -0.01831900 | -0.00364891 | 0.02687273  |
|   |          | -0.11110873 | -0.01798381 | -0.04649972 |             |             |
|   | 12       | -0.00085719 | -0.00022209 | 0.00203830  | 0.00220255  | -0.00494584 |
|   |          | 0.05579593  | -0.01326395 | 0.01286782  |             |             |
|   | 13       | -0.00075229 | 0.00388812  | 0.00185468  | 0.00179874  | 0.00209982  |
|   |          | 0.00716448  | 0.02403313  | 0.01853455  |             |             |
|   | 14       | 0.00279197  | -0.00794019 | -0.01718341 | -0.00169300 | 0.02235948  |
|   |          | -0.08374649 | -0.02058140 | -0.02815443 |             |             |
|   | 15       | 0.01695605  | -0.01409601 | -0.04752559 | -0.00966381 | 0.09576973  |
|   |          | -0.71220521 | 0.19126935  | -0.06318394 |             |             |

16 -0.00535277 0.00482788 0.00696164 -0.00188000 -0.01224738  
 0.00613703 0.00474662 -0.00901863

9 10 11 12 13  
 14 15 16

995.6986 1185.0098 1364.4600 1378.2401 1453.6426  
 2945.5693 2955.2901 3023.0359

-----  
 -----  
 1 -0.02649759 0.02196355 -0.00330221 0.00425852 0.00095946  
 0.00271456 0.00083099 0.00037395  
 2 0.11071425 -0.03323702 -0.01281416 0.01042866 0.00503195  
 0.00264173 0.00067170 -0.00111440  
 3 -0.11367512 -0.01605255 0.00971718 0.00684841 -0.00043847  
 -0.00068594 0.00004770 0.00052585  
 4 -0.04797348 0.02513235 -0.00539587 -0.00262019 0.00377350  
 -0.00020152 0.00047757 0.00022812  
 5 0.00557764 -0.04284356 0.00030797 0.00678521 0.00066074  
 -0.00050602 0.00006132 0.00009740  
 6 0.00187678 -0.00518208 -0.00416333 0.00945098 0.00422129  
 0.00029164 0.00059301 0.00039742  
 7 0.00441484 -0.02019302 -0.01690645 0.02172470 0.00561152  
 0.00514634 0.00092834 -0.00084077  
 8 0.60184040 -0.74901205 0.02005696 -0.06328842 -0.10854413  
 0.04963509 -0.00131005 -0.00990938  
 9 -0.53931602 -0.50818108 -0.05944135 0.45869337 -0.09297279  
 0.40100494 -0.00571190 -0.04223191  
 10 0.16011401 0.03289597 0.58702787 -0.00974958 -0.26974108  
 -0.08491964 -0.31712642 -0.35635443  
 11 0.35558257 0.28523614 -0.54834707 0.33272555 -0.29209826  
 0.20976011 0.10383127 -0.47409525  
 12 -0.04363810 -0.08925349 0.23487813 0.01625781 0.53696498  
 -0.05367223 0.52976897 -0.59945081  
 13 -0.23677828 -0.21381509 -0.42874085 -0.35928382 0.19362314  
 -0.25516086 -0.55247786 -0.42010426  
 14 0.30325825 0.11883187 0.03372419 0.37469578 0.66926255  
 0.26165187 -0.45119589 0.15273744  
 15 0.12908980 -0.12517405 -0.32644776 -0.24880692 0.21812596  
 -0.10753374 0.31475625 0.28488203  
 16 -0.00394300 0.10035894 0.05902879 -0.58511081 0.00946431  
 0.79841473 -0.00876349 -0.07775307

Intensities

| Frequency<br>Intensity (degeneracy not counted)<br>cm-1 | Dipole Strength<br>1e-40 esu <sup>2</sup> cm <sup>2</sup> | Absorption<br>km/mole |
|---------------------------------------------------------|-----------------------------------------------------------|-----------------------|
| -----                                                   | -----                                                     | -----                 |
| 133.316608                                              | 3.732124                                                  | 0.124715              |
| 246.160932                                              | 114.537398                                                | 7.067153              |
| 276.475588                                              | 43.559978                                                 | 3.018718              |
| 318.889833                                              | 10.610321                                                 | 0.848100              |

|             |            |            |
|-------------|------------|------------|
| 524.492227  | 93.096035  | 12.239067  |
| 931.720670  | 56.031974  | 13.085783  |
| 956.823714  | 482.167020 | 115.639845 |
| 985.315076  | 115.127935 | 28.433735  |
| 995.698590  | 21.136583  | 5.275222   |
| 1185.009807 | 44.872796  | 13.328557  |
| 1364.460050 | 12.560709  | 4.295889   |
| 1378.240098 | 13.433053  | 4.640638   |
| 1453.642581 | 12.162459  | 4.431565   |
| 2945.569306 | 11.252760  | 8.308189   |
| 2955.290098 | 17.079644  | 12.651936  |
| 3023.035850 | 5.530821   | 4.190936   |

==== AAA ====

### Symmetry Displacements

|                      | 1                   | 2                    |
|----------------------|---------------------|----------------------|
| 3                    | -----               | -----                |
| -----                |                     |                      |
| 1.Re                 | 0.000 0.000 0.038   | 0.000 0.000 0.000    |
| 0.000 0.000 0.000    |                     |                      |
| 2.O                  | 0.028 -0.001 -0.108 | 0.060 0.099 0.095    |
| 0.139 -0.050 0.000   |                     |                      |
| 3.O                  | -0.028 0.001 -0.108 | -0.060 -0.099 0.095  |
| -0.139 0.050 0.000   |                     |                      |
| 4.O                  | 0.000 0.000 -0.124  | 0.000 0.000 -0.102   |
| 0.000 0.000 0.106    |                     |                      |
| 5.C                  | 0.000 0.000 -0.066  | 0.000 0.000 -0.033   |
| 0.000 0.000 -0.044   |                     |                      |
| 6.C                  | 0.000 0.000 -0.045  | 0.000 0.000 -0.068   |
| 0.000 0.000 -0.067   |                     |                      |
| 7.H                  | -0.017 0.001 -0.047 | -0.037 -0.061 -0.116 |
| 0.053 0.031 -0.039   |                     |                      |
| 8.H                  | 0.017 -0.001 -0.047 | 0.037 0.061 -0.116   |
| -0.053 -0.031 -0.039 |                     |                      |
| 9.H                  | 0.000 0.000 -0.026  | 0.000 0.000 0.003    |
| 0.000 0.000 -0.142   |                     |                      |
| 10.H                 | 0.017 -0.001 -0.065 | 0.037 0.061 0.015    |
| -0.053 -0.031 -0.072 |                     |                      |
| 11.H                 | -0.017 0.001 -0.065 | -0.037 -0.061 0.015  |
| 0.053 0.031 -0.072   |                     |                      |

|                   | 4                 | 5                 |
|-------------------|-------------------|-------------------|
| 6                 | -----             | -----             |
| -----             |                   |                   |
| 1.Re              | 0.000 0.000 0.000 | 0.000 0.000 0.000 |
| 0.000 0.000 0.000 |                   |                   |
| 2.O               | 0.000 0.068 0.000 | 0.000 0.000 0.000 |
| 0.000 0.000 0.000 |                   |                   |





10 0.06469838 -0.17816176 -0.45910128  
 11 -0.35472687 -0.43057055 -0.09879881

=====  
 Intensities

| Intensity (degeneracy not counted) | Frequency<br>cm-1 | Dipole Strength<br>1e-40 esu <sup>2</sup> cm <sup>2</sup> | Absorption<br>km/mole |
|------------------------------------|-------------------|-----------------------------------------------------------|-----------------------|
|                                    | -----             | -----                                                     | -----                 |
|                                    | 83.867643         | 10.000347                                                 | 0.210227              |
|                                    | 170.332699        | 0.272242                                                  | 0.011623              |
|                                    | 241.754946        | 2.988017                                                  | 0.181066              |
|                                    | 320.465696        | 10.001040                                                 | 0.803350              |
|                                    | 648.358263        | 4.533928                                                  | 0.736831              |
|                                    | 912.833860        | 87.267841                                                 | 19.967516             |
|                                    | 960.448548        | 474.330077                                                | 114.191253            |
|                                    | 1200.444451       | 0.407669                                                  | 0.122667              |
|                                    | 1448.676785       | 36.815018                                                 | 13.368251             |
|                                    | 2994.230310       | 0.086824                                                  | 0.065163              |
|                                    | 3045.836025       | 6.422284                                                  | 4.903138              |

Zero-Point Energy : 0.072221 a.u.  
 =====  
 1.965236 eV

=====  
 Vibrations and Normal Modes \*\*\* (cartesian coordinates, NOT  
 mass-weighted) \*\*\*  
 =====

The headers on the normal mode eigenvectors below give the Frequency in cm-1  
 (a negative value means an imaginary frequency, no output for  
 (almost-)zero frequencies)

|        | 83.868 | 170.333 | 133.317 |        |        |        |
|--------|--------|---------|---------|--------|--------|--------|
|        | -----  | -----   | -----   |        |        |        |
| 1.Re   | 0.000  | 0.000   | -0.015  | 0.010  | 0.031  | 0.000  |
| 0.000  | 0.000  | 0.017   |         |        |        |        |
| 2.O    | -0.135 | 0.041   | -0.024  | 0.194  | -0.005 | -0.002 |
| 0.115  | 0.044  | -0.026  |         |        |        |        |
| 3.O    | 0.135  | -0.041  | -0.024  | 0.194  | -0.005 | 0.002  |
| -0.115 | -0.044 | -0.026  |         |        |        |        |
| 4.O    | 0.000  | 0.000   | 0.111   | -0.249 | -0.140 | 0.000  |
| 0.000  | 0.000  | -0.025  |         |        |        |        |
| 5.C    | 0.000  | 0.000   | -0.127  | -0.005 | 0.021  | 0.000  |
| 0.000  | 0.000  | -0.083  |         |        |        |        |
| 6.C    | 0.000  | 0.000   | 0.243   | -0.264 | -0.227 | 0.000  |



0.000 0.000 -0.039  
7.H -0.020 0.289 0.446 -0.425 -0.203 -0.001  
0.306 0.331 0.232  
8.H 0.020 -0.289 0.446 -0.425 -0.203 0.001  
-0.306 -0.331 0.232  
9.H 0.000 0.000 0.119 -0.160 -0.477 0.000  
0.000 0.000 -0.556  
10.H 0.045 -0.238 -0.295 0.109 -0.012 -0.008  
-0.099 -0.139 -0.197  
11.H -0.045 0.238 -0.295 0.109 -0.012 0.008  
0.099 0.139 -0.197

241.755 246.161  
276.476  
-----  
-----  
1.Re 0.000 0.000 -0.016 -0.054 -0.046 0.000  
-0.065 0.021 0.000  
2.O -0.076 -0.032 0.012 0.301 0.045 -0.123  
0.201 -0.007 -0.014  
3.O 0.076 0.032 0.012 0.301 0.045 0.123  
0.201 -0.007 0.014  
4.O 0.000 0.000 0.005 0.438 0.288 0.000  
-0.069 0.036 0.000  
5.C 0.000 0.000 0.170 -0.175 0.107 0.000  
0.108 -0.248 0.000  
6.C 0.000 0.000 -0.004 -0.262 0.072 0.000  
0.339 -0.070 0.000  
7.H 0.351 0.213 0.186 -0.311 0.079 0.001  
0.494 -0.087 0.003  
8.H -0.351 -0.213 0.186 -0.311 0.079 -0.001  
0.494 -0.087 -0.003  
9.H 0.000 0.000 -0.529 -0.233 0.000 0.000  
0.228 0.201 0.000  
10.H 0.053 0.188 0.313 -0.236 0.092 -0.011  
0.092 -0.227 0.011  
11.H -0.053 -0.188 0.313 -0.236 0.092 0.011  
0.092 -0.227 -0.011

318.890 320.466  
524.492  
-----  
-----  
1.Re 0.011 -0.069 0.000 0.000 0.000 0.077  
-0.033 -0.015 0.000  
2.O -0.047 0.530 -0.402 -0.271 0.338 -0.066  
-0.002 -0.010 -0.004  
3.O -0.047 0.530 0.402 0.271 -0.338 -0.066  
-0.002 -0.010 0.004  
4.O -0.134 -0.207 0.000 0.000 0.000 -0.773  
0.033 0.012 0.000  
5.C 0.036 -0.033 0.000 0.000 0.000 0.000  
0.351 0.278 0.000

|        |        |        |        |        |        |        |
|--------|--------|--------|--------|--------|--------|--------|
| 6.C    | 0.070  | -0.024 | 0.000  | 0.000  | 0.000  | 0.002  |
| 0.066  | -0.028 | 0.000  |        |        |        |        |
| 7.H    | 0.112  | -0.023 | 0.006  | -0.017 | -0.026 | -0.019 |
| -0.166 | -0.005 | -0.007 |        |        |        |        |
| 8.H    | 0.112  | -0.023 | -0.006 | 0.017  | 0.026  | -0.019 |
| -0.166 | -0.005 | 0.007  |        |        |        |        |
| 9.H    | 0.048  | 0.032  | 0.000  | 0.000  | 0.000  | 0.024  |
| 0.239  | -0.438 | 0.000  |        |        |        |        |
| 10.H   | 0.050  | -0.049 | -0.005 | 0.023  | 0.041  | 0.040  |
| 0.436  | 0.230  | -0.016 |        |        |        |        |
| 11.H   | 0.050  | -0.049 | 0.005  | -0.023 | -0.041 | 0.040  |
| 0.436  | 0.230  | 0.016  |        |        |        |        |

648.358                      912.834  
931.721

|        |        |        |        |        |        |        |
|--------|--------|--------|--------|--------|--------|--------|
| 1.Re   | 0.000  | 0.000  | -0.003 | 0.000  | 0.000  | -0.006 |
| 0.004  | -0.007 | 0.000  |        |        |        |        |
| 2.O    | -0.020 | -0.010 | -0.011 | 0.013  | 0.030  | 0.047  |
| 0.003  | 0.016  | 0.017  |        |        |        |        |
| 3.O    | 0.020  | 0.010  | -0.011 | -0.013 | -0.030 | 0.047  |
| 0.003  | 0.016  | -0.017 |        |        |        |        |
| 4.O    | 0.000  | 0.000  | -0.002 | 0.000  | 0.000  | 0.004  |
| -0.045 | 0.062  | 0.000  |        |        |        |        |
| 5.C    | 0.000  | 0.000  | 0.149  | 0.000  | 0.000  | -0.050 |
| -0.057 | 0.033  | 0.000  |        |        |        |        |
| 6.C    | 0.000  | 0.000  | 0.009  | 0.000  | 0.000  | 0.067  |
| 0.132  | -0.020 | 0.000  |        |        |        |        |
| 7.H    | 0.154  | -0.219 | -0.134 | 0.254  | -0.315 | -0.138 |
| -0.246 | -0.034 | -0.046 |        |        |        |        |
| 8.H    | -0.154 | 0.219  | -0.134 | -0.254 | 0.315  | -0.138 |
| -0.246 | -0.034 | 0.046  |        |        |        |        |
| 9.H    | 0.000  | 0.000  | -0.102 | 0.000  | 0.000  | -0.247 |
| 0.340  | -0.541 | 0.000  |        |        |        |        |
| 10.H   | -0.246 | -0.512 | -0.265 | 0.523  | -0.071 | -0.035 |
| -0.456 | 0.094  | -0.005 |        |        |        |        |
| 11.H   | 0.246  | 0.512  | -0.265 | -0.523 | 0.071  | -0.035 |
| -0.456 | 0.094  | 0.005  |        |        |        |        |

956.824                      960.449  
985.315

|        |        |        |        |        |        |        |
|--------|--------|--------|--------|--------|--------|--------|
| 1.Re   | 0.020  | -0.073 | 0.000  | 0.000  | 0.000  | -0.067 |
| -0.038 | -0.007 | 0.000  |        |        |        |        |
| 2.O    | 0.030  | 0.187  | 0.251  | 0.045  | 0.224  | 0.367  |
| 0.071  | 0.283  | 0.431  |        |        |        |        |
| 3.O    | 0.030  | 0.187  | -0.251 | -0.045 | -0.224 | 0.367  |
| 0.071  | 0.283  | -0.431 |        |        |        |        |
| 4.O    | -0.302 | 0.453  | 0.000  | 0.000  | 0.000  | 0.021  |
| 0.327  | -0.473 | 0.000  |        |        |        |        |
| 5.C    | 0.123  | -0.076 | 0.000  | 0.000  | 0.000  | 0.079  |

|        |        |        |        |        |        |        |  |
|--------|--------|--------|--------|--------|--------|--------|--|
| -0.028 | -0.047 | 0.000  |        |        |        |        |  |
| 6.C    | -0.152 | 0.085  | 0.000  | 0.000  | 0.000  | -0.063 |  |
| 0.022  | 0.044  | 0.000  |        |        |        |        |  |
| 7.H    | 0.085  | 0.093  | 0.030  | -0.206 | 0.252  | 0.099  |  |
| -0.138 | 0.014  | -0.034 |        |        |        |        |  |
| 8.H    | 0.085  | 0.093  | -0.030 | 0.206  | -0.252 | 0.099  |  |
| -0.138 | 0.014  | 0.034  |        |        |        |        |  |
| 9.H    | -0.253 | 0.347  | 0.000  | 0.000  | 0.000  | 0.175  |  |
| 0.127  | -0.217 | 0.000  |        |        |        |        |  |
| 10.H   | 0.314  | -0.131 | -0.011 | -0.414 | -0.054 | -0.018 |  |
| -0.087 | -0.011 | 0.024  |        |        |        |        |  |
| 11.H   | 0.314  | -0.131 | 0.011  | 0.414  | 0.054  | -0.018 |  |
| -0.087 | -0.011 | -0.024 |        |        |        |        |  |

|          |         |        |          |        |        |        |  |
|----------|---------|--------|----------|--------|--------|--------|--|
|          | 995.699 |        | 1185.010 |        |        |        |  |
| 1200.444 |         |        |          |        |        |        |  |
| -----    | -----   |        | -----    |        |        |        |  |
| -----    |         |        |          |        |        |        |  |
| 1.Re     | -0.002  | 0.007  | 0.000    | -0.001 | 0.002  | 0.000  |  |
| 0.000    | 0.000   | -0.002 |          |        |        |        |  |
| 2.O      | -0.003  | -0.022 | -0.035   | -0.001 | 0.001  | 0.003  |  |
| -0.001   | 0.003   | 0.006  |          |        |        |        |  |
| 3.O      | -0.003  | -0.022 | 0.035    | -0.001 | 0.001  | -0.003 |  |
| 0.001    | -0.003  | 0.006  |          |        |        |        |  |
| 4.O      | 0.005   | -0.029 | 0.000    | 0.003  | -0.013 | 0.000  |  |
| 0.000    | 0.000   | 0.001  |          |        |        |        |  |
| 5.C      | 0.203   | -0.252 | 0.000    | 0.168  | 0.027  | 0.000  |  |
| 0.000    | 0.000   | -0.090 |          |        |        |        |  |
| 6.C      | -0.088  | 0.257  | 0.000    | -0.074 | -0.063 | 0.000  |  |
| 0.000    | 0.000   | 0.128  |          |        |        |        |  |
| 7.H      | -0.478  | 0.239  | -0.054   | 0.224  | 0.005  | 0.075  |  |
| 0.181    | -0.320  | -0.087 |          |        |        |        |  |
| 8.H      | -0.478  | 0.239  | 0.054    | 0.224  | 0.005  | -0.075 |  |
| -0.181   | 0.320   | -0.087 |          |        |        |        |  |
| 9.H      | 0.151   | -0.322 | 0.000    | -0.202 | 0.270  | 0.000  |  |
| 0.000    | 0.000   | -0.238 |          |        |        |        |  |
| 10.H     | -0.108  | -0.212 | -0.005   | -0.601 | 0.017  | -0.085 |  |
| -0.479   | 0.289   | 0.065  |          |        |        |        |  |
| 11.H     | -0.108  | -0.212 | 0.005    | -0.601 | 0.017  | 0.085  |  |
| 0.479    | -0.289  | 0.065  |          |        |        |        |  |

|          |          |        |          |        |       |        |  |
|----------|----------|--------|----------|--------|-------|--------|--|
|          | 1364.460 |        | 1378.240 |        |       |        |  |
| 1448.677 |          |        |          |        |       |        |  |
| -----    | -----    |        | -----    |        |       |        |  |
| -----    |          |        |          |        |       |        |  |
| 1.Re     | 0.000    | 0.001  | 0.000    | 0.000  | 0.000 | 0.000  |  |
| 0.000    | 0.000    | 0.000  |          |        |       |        |  |
| 2.O      | 0.001    | -0.001 | -0.002   | 0.001  | 0.000 | -0.001 |  |
| -0.001   | 0.001    | 0.001  |          |        |       |        |  |
| 3.O      | 0.001    | -0.001 | 0.002    | 0.001  | 0.000 | 0.001  |  |
| 0.001    | -0.001   | 0.001  |          |        |       |        |  |
| 4.O      | 0.000    | 0.000  | 0.000    | -0.001 | 0.001 | 0.000  |  |
| 0.000    | 0.000    | 0.000  |          |        |       |        |  |

|        |        |        |        |        |        |        |
|--------|--------|--------|--------|--------|--------|--------|
| 5.C    | -0.008 | 0.009  | 0.000  | 0.016  | -0.082 | 0.000  |
| 0.000  | 0.000  | -0.019 |        |        |        |        |
| 6.C    | -0.090 | 0.089  | 0.000  | -0.023 | 0.000  | 0.000  |
| 0.000  | 0.000  | -0.046 |        |        |        |        |
| 7.H    | 0.462  | -0.276 | -0.180 | 0.067  | -0.034 | -0.012 |
| 0.507  | 0.023  | 0.051  |        |        |        |        |
| 8.H    | 0.462  | -0.276 | 0.180  | 0.067  | -0.034 | 0.012  |
| -0.507 | -0.023 | 0.051  |        |        |        |        |
| 9.H    | 0.195  | -0.538 | 0.000  | -0.015 | -0.020 | 0.000  |
| 0.000  | 0.000  | 0.687  |        |        |        |        |
| 10.H   | -0.002 | -0.062 | -0.045 | -0.003 | 0.552  | 0.431  |
| -0.031 | 0.037  | 0.002  |        |        |        |        |
| 11.H   | -0.002 | -0.062 | 0.045  | -0.003 | 0.552  | -0.431 |
| 0.031  | -0.037 | 0.002  |        |        |        |        |

|          |          |          |
|----------|----------|----------|
|          | 1453.643 | 2945.569 |
| 2955.290 |          |          |

|        |        |        |        |        |        |        |
|--------|--------|--------|--------|--------|--------|--------|
| 1.Re   | 0.000  | 0.000  | 0.000  | 0.000  | 0.000  | 0.000  |
| 0.000  | 0.000  | 0.000  |        |        |        |        |
| 2.O    | 0.000  | 0.000  | 0.000  | 0.000  | 0.000  | 0.000  |
| 0.000  | 0.000  | 0.000  |        |        |        |        |
| 3.O    | 0.000  | 0.000  | 0.000  | 0.000  | 0.000  | 0.000  |
| 0.000  | 0.000  | 0.000  |        |        |        |        |
| 4.O    | 0.000  | 0.000  | 0.000  | 0.000  | 0.000  | 0.000  |
| 0.000  | 0.000  | 0.000  |        |        |        |        |
| 5.C    | 0.022  | 0.009  | 0.000  | -0.009 | -0.066 | 0.000  |
| -0.001 | -0.001 | 0.000  |        |        |        |        |
| 6.C    | 0.032  | 0.041  | 0.000  | 0.005  | 0.007  | 0.000  |
| -0.048 | 0.019  | 0.000  |        |        |        |        |
| 7.H    | -0.210 | -0.480 | -0.386 | -0.001 | -0.025 | 0.039  |
| -0.056 | -0.266 | 0.380  |        |        |        |        |
| 8.H    | -0.210 | -0.480 | 0.386  | -0.001 | -0.025 | -0.039 |
| -0.056 | -0.266 | -0.380 |        |        |        |        |
| 9.H    | -0.125 | 0.360  | 0.000  | -0.067 | -0.028 | 0.000  |
| 0.684  | 0.303  | 0.000  |        |        |        |        |
| 10.H   | -0.037 | 0.010  | -0.007 | 0.062  | 0.394  | -0.578 |
| 0.001  | 0.005  | -0.006 |        |        |        |        |
| 11.H   | -0.037 | 0.010  | 0.007  | 0.062  | 0.394  | 0.578  |
| 0.001  | 0.005  | 0.006  |        |        |        |        |

|          |          |          |
|----------|----------|----------|
|          | 2994.230 | 3023.036 |
| 3045.836 |          |          |

|       |       |       |       |       |       |       |
|-------|-------|-------|-------|-------|-------|-------|
| 1.Re  | 0.000 | 0.000 | 0.000 | 0.000 | 0.000 | 0.000 |
| 0.000 | 0.000 | 0.000 |       |       |       |       |
| 2.O   | 0.000 | 0.000 | 0.000 | 0.000 | 0.000 | 0.000 |
| 0.000 | 0.000 | 0.000 |       |       |       |       |
| 3.O   | 0.000 | 0.000 | 0.000 | 0.000 | 0.000 | 0.000 |
| 0.000 | 0.000 | 0.000 |       |       |       |       |
| 4.O   | 0.000 | 0.000 | 0.000 | 0.000 | 0.000 | 0.000 |

```

0.000 0.000 0.000
  5.C    0.000 0.000 0.091    0.002 0.007 0.000
0.000 0.000 0.018
  6.C    0.000 0.000 -0.018    0.056 0.071 0.000
0.000 0.000 0.091
  7.H    -0.016 -0.081 0.112    -0.039 -0.295 0.442
0.071 0.404 -0.555
  8.H    0.016 0.081 0.112    -0.039 -0.295 -0.442
-0.071 -0.404 -0.555
  9.H    0.000 0.000 -0.006    -0.593 -0.247 0.000
0.000 0.000 0.021
 10.H    0.071 0.409 -0.551    -0.007 -0.042 0.057
0.012 0.083 -0.110
 11.H    -0.071 -0.409 -0.551    -0.007 -0.042 -0.057
-0.012 -0.083 -0.110
    
```

List of All Frequencies:

Intensities

| Frequency<br>Intensity (degeneracy not counted)<br>cm-1 | Dipole Strength<br>1e-40 esu <sup>2</sup> cm <sup>2</sup> | Absorption<br>km/mole |
|---------------------------------------------------------|-----------------------------------------------------------|-----------------------|
| -----                                                   | -----                                                     | -----                 |
| 83.867643                                               | 10.000347                                                 | 0.210227              |
| 133.316608                                              | 3.732124                                                  | 0.124715              |
| 170.332699                                              | 0.272242                                                  | 0.011623              |
| 241.754946                                              | 2.988017                                                  | 0.181066              |
| 246.160932                                              | 114.537398                                                | 7.067153              |
| 276.475588                                              | 43.559978                                                 | 3.018718              |
| 318.889833                                              | 10.610321                                                 | 0.848100              |
| 320.465696                                              | 10.001040                                                 | 0.803350              |
| 524.492227                                              | 93.096035                                                 | 12.239067             |
| 648.358263                                              | 4.533928                                                  | 0.736831              |
| 912.833860                                              | 87.267841                                                 | 19.967516             |
| 931.720670                                              | 56.031974                                                 | 13.085783             |
| 956.823714                                              | 482.167020                                                | 115.639845            |
| 960.448548                                              | 474.330077                                                | 114.191253            |
| 985.315076                                              | 115.127935                                                | 28.433735             |
| 995.698590                                              | 21.136583                                                 | 5.275222              |
| 1185.009807                                             | 44.872796                                                 | 13.328557             |
| 1200.444451                                             | 0.407669                                                  | 0.122667              |
| 1364.460050                                             | 12.560709                                                 | 4.295889              |
| 1378.240098                                             | 13.433053                                                 | 4.640638              |
| 1448.676785                                             | 36.815018                                                 | 13.368251             |
| 1453.642581                                             | 12.162459                                                 | 4.431565              |
| 2945.569306                                             | 11.252760                                                 | 8.308189              |
| 2955.290098                                             | 17.079644                                                 | 12.651936             |
| 2994.230310                                             | 0.086824                                                  | 0.065163              |
| 3023.035850                                             | 5.530821                                                  | 4.190936              |

3045.836025      6.422284      4.903138  
1

=====  
Statistical Thermal Analysis \*\*\* ideal gas assumed \*\*\*  
=====

Pressure:            1.000000 atm.  
Temperature:        298.150000 K

Moments of Inertia (and direction vectors)  
=====

|          |          |          |
|----------|----------|----------|
| 504.6128 | 989.3773 | 998.7717 |
| -----    |          |          |
| 0.9900   | 0.1414   | 0.0000   |
| -0.1414  | 0.9900   | 0.0000   |
| 0.0000   | 0.0000   | 1.0000   |

| Temp   |       |        |       |
|--------|-------|--------|-------|
| Transl | Rotat | Vibrat | Total |
| ----   | ----- | -----  |       |
| -----  | ----- | -----  |       |

|        |                                             |        |        |
|--------|---------------------------------------------|--------|--------|
| 298.15 | Entropy (cal/mole-K):                       |        |        |
| 42.612 | 27.702                                      | 18.654 | 88.968 |
|        | Internal Energy (Kcal/mole):                |        |        |
| 0.889  | 0.889                                       | 48.424 | 50.202 |
|        | Constant Volume Heat Capacity (cal/mole-K): |        |        |
| 2.981  | 2.981                                       | 19.818 | 25.780 |
