# Supplementary material for: Structure and vibrational properties of ethyltrioxorhenium(vii), C2H5ReO3, investigated by gas electron diffraction, single crystal X-ray diffraction, IR spectroscopy and quantum chemical calculations
Source: Royal Society of Chemistry journal article supplement (doi:10.1039/b204235p), 2002-01-01
Supplement: b204235p-3.pdf [file b204235p-3.pdf]

Supplementary Material (ESI) for Dalton Transactions  
This journal is © The Royal Society of Chemistry 2002

ReO3Et

| Atom | X         | Y         | Z (Angstrom) |
|------|-----------|-----------|--------------|
| 1.Re | 0.003607  | 0.000689  | -0.000052    |
| 2.O  | 1.728069  | -0.003641 | -0.035517    |
| 3.O  | -0.665475 | 1.590324  | 0.009013     |
| 4.O  | -0.697716 | -1.019075 | -1.201140    |
| 5.C  | -0.530055 | -0.851136 | 1.840883     |
| 6.C  | -0.000100 | -0.091981 | 3.062488     |
| 7.H  | -0.381443 | 0.936800  | 3.095743     |
| 8.H  | 1.096784  | -0.051479 | 3.068698     |
| 9.H  | -0.323673 | -0.600987 | 3.982838     |
| 10.H | -0.153951 | -1.886512 | 1.801869     |
| 11.H | -1.631188 | -0.899565 | 1.829459     |

Bond Energy LDA -2.65092600 a.u.  
Bond Energy LDA -72.13539624 eV  
+ GGA-X -2.33493969 a.u.  
+ GGA-X -63.53696760 eV  
+ GGA-XC -2.47270385 a.u.  
+ GGA-XC -67.28572284 eV
